# Supplementary material for: Complex-Type N-Glycans Influence the Root Hair Landscape of Arabidopsis Seedlings by Altering the Auxin Output
Source: Frontiers journal article supplement (doi:10.3389/fpls.2021.635714), 2021-02-18
Supplement: Data_Sheet_1.zip [file Data_Sheet_1.zip]

## Sheet: Sheet1
GeneID	Base mean	log2(FC)	StdErr	Wald-Stats	P-value	P-adj
AT2G43590	1464.33	4.56485	0.165886	27.518	1.06789e-166	2.33056e-162
AT4G24420	239.137	-3.47386	0.168982	-20.5575	6.59408e-94	7.19546e-90
AT5G38005	88.6294	2.88919	0.178896	16.1501	1.1338e-58	8.24805e-55
AT5G38350	86.3452	2.70707	0.177176	15.279	1.0555e-52	5.75881e-49
AT4G25100	5142.87	1.41747	0.0971596	14.5891	3.29393e-48	1.43773e-44
AT4G27050	671.662	-1.59027	0.110716	-14.3635	8.76957e-47	3.18978e-43
AT4G32230	65.6725	-2.41359	0.181357	-13.3085	2.06594e-40	6.44101e-37
AT4G29770	59.0254	-2.40688	0.181036	-13.2951	2.47297e-40	6.74626e-37
AT2G43620	198.332	-2.08165	0.162517	-12.8088	1.46379e-37	3.54953e-34
AT2G02360	158.074	2.04503	0.160258	12.7609	2.71182e-37	5.91828e-34
AT4G29760	52.1142	-2.25697	0.181387	-12.4429	1.52935e-35	3.03424e-32
AT5G66380	355.181	-1.493	0.131357	-11.3659	6.18046e-30	1.12402e-26
AT2G44220	56.0016	-1.99944	0.181399	-11.0224	2.98088e-28	5.0042e-25
AT4G22350	305.886	-1.46753	0.134624	-10.901	1.14038e-27	1.7777e-24
AT4G28900	40.0358	1.94258	0.181077	10.7279	7.52605e-27	9.66167e-24
AT2G44370	1033.77	-1.15942	0.108053	-10.7301	7.35258e-27	9.66167e-24
AT4G22235	242.998	-1.63426	0.152245	-10.7344	7.01734e-27	9.66167e-24
AT5G38910	286.303	1.66652	0.157343	10.5916	3.25884e-26	3.95117e-23
AT5G38590	259.607	-1.36906	0.131863	-10.3825	2.97995e-25	3.42286e-22
AT4G22460	156.776	1.57311	0.155359	10.1256	4.25309e-24	4.64097e-21
AT4G27890	30.7184	-1.73928	0.179459	-9.6918	3.26729e-22	3.3955e-19
AT2G16005	902.521	-1.31686	0.139327	-9.45158	3.33756e-21	3.31086e-18
AT2G02960	896.365	1.03215	0.111291	9.27434	1.78727e-20	1.69588e-17
AT4G22960	64.7758	-1.49617	0.176404	-8.48148	2.22343e-17	2.02184e-14
AT5G40990	50.7545	1.50507	0.180248	8.35001	6.82559e-17	5.95847e-14
AT4G27080	1297.81	-0.876183	0.105973	-8.26795	1.36282e-16	1.14393e-13
AT5G39770	24.2027	-1.44578	0.176165	-8.20694	2.26903e-16	1.83405e-13
AT5G38540	52.8176	1.45783	0.181116	8.04916	8.33616e-16	6.49744e-13
AT3G52970	107.636	1.36736	0.17541	7.79522	6.42983e-15	4.83878e-12
AT4G29905	1602.58	0.958037	0.12682	7.55432	4.21063e-14	3.06309e-11
AT5G40950	433.114	0.963567	0.128019	7.52678	5.20063e-14	3.66125e-11
AT2G02250	36.7305	-1.3193	0.179098	-7.36632	1.75401e-13	1.19624e-10
AT5G41140	675.726	0.955302	0.132387	7.216	5.35376e-13	3.54062e-10
AT5G38030	591.891	1.15298	0.161281	7.14891	8.74694e-13	5.61451e-10
AT3G51350	439.846	0.843728	0.121034	6.97098	3.14742e-12	1.96255e-09
AT4G22410	18.7656	-1.1701	0.168074	-6.96181	3.35927e-12	2.03646e-09
AT4G30140	543.764	1.0029	0.144443	6.94318	3.83379e-12	2.26131e-09
AT4G22230	354.375	-1.23001	0.177253	-6.9393	3.94049e-12	2.26309e-09
AT4G25400	406.662	1.06709	0.155764	6.85067	7.35044e-12	4.11323e-09
AT1G68040	37.3915	1.20133	0.175849	6.83158	8.3986e-12	4.47051e-09
AT5G40910	488.586	0.807505	0.118157	6.83418	8.24733e-12	4.47051e-09
AT2G42270	519.925	0.925593	0.138576	6.67931	2.40067e-11	1.24743e-08
AT5G39100	28.0581	-1.1319	0.169844	-6.66435	2.65838e-11	1.34922e-08
AT2G44230	186.326	1.1319	0.173826	6.51166	7.43273e-11	3.60471e-08
AT5G39800	89.0575	1.08453	0.166489	6.51408	7.31349e-11	3.60471e-08
AT4G27400	44.792	1.17336	0.181351	6.47014	9.79105e-11	4.64521e-08
AT2G43535	2723.8	-0.672806	0.104777	-6.42134	1.35081e-10	6.27237e-08
AT5G41370	615.201	0.742747	0.115784	6.41494	1.40882e-10	6.40544e-08
AT5G37990	2240.39	0.977718	0.152958	6.39205	1.6368e-10	7.29011e-08
AT4G33880	191.512	0.941078	0.147302	6.38877	1.67224e-10	7.299e-08
AT5G24140	178.492	-1.13263	0.177525	-6.3801	1.76974e-10	7.57311e-08
AT5G38344	17.6981	1.08863	0.171299	6.35512	2.08263e-10	8.74063e-08
AT4G23980	554.318	0.870211	0.138145	6.29926	2.99069e-10	1.23149e-07
AT4G38240	490.645	0.697023	0.110862	6.28729	3.2306e-10	1.30564e-07
AT3G62040	3928.04	0.541445	0.0868319	6.23555	4.50195e-10	1.78637e-07
AT5G23820	1734.88	-0.684165	0.110113	-6.21331	5.18787e-10	2.02179e-07
AT4G24920	1563.42	0.648502	0.105089	6.17097	6.78704e-10	2.5986e-07
AT5G37830	944.851	0.73594	0.121289	6.06766	1.29787e-09	4.88356e-07
AT2G42250	144.841	1.07113	0.177333	6.0402	1.53925e-09	5.69364e-07
AT5G40920	194.457	-0.90345	0.15047	-6.00419	1.92286e-09	6.99407e-07
AT2G02690	15.1657	0.969359	0.161789	5.99149	2.07928e-09	7.43904e-07
AT1G49310	573.815	0.726421	0.123744	5.87037	4.34814e-09	1.53054e-06
AT4G29740	241.632	1.01301	0.176582	5.73677	9.65017e-09	3.31924e-06
AT2G43570	788.947	1.01282	0.176594	5.7353	9.73384e-09	3.31924e-06
AT4G23700	1337.82	0.867767	0.152472	5.69132	1.26062e-08	4.23258e-06
AT2G02310	20.3701	0.971084	0.174548	5.56343	2.64525e-08	8.74697e-06
AT5G36870	53.7667	1.00552	0.181162	5.55041	2.84994e-08	9.28315e-06
AT5G38010	146.481	0.982957	0.177603	5.53459	3.11959e-08	1.0012e-05
AT2G02800	936.368	0.634857	0.114839	5.52822	3.23499e-08	1.02319e-05
AT5G40370	1862.18	-0.539263	0.0979592	-5.50498	3.69212e-08	1.1511e-05
AT5G59700	235.689	0.735151	0.134366	5.47127	4.46819e-08	1.35436e-05
AT4G27070	396.325	-0.728232	0.13308	-5.47215	4.44611e-08	1.35436e-05
AT5G65210	5036.49	0.4656	0.0852928	5.45885	4.7924e-08	1.43273e-05
AT5G23660	67.5676	-0.977926	0.180469	-5.41881	5.99977e-08	1.76945e-05
AT2G03070	198.377	0.763778	0.141549	5.39585	6.81984e-08	1.98448e-05
AT5G19600	483.605	0.875123	0.162465	5.38654	7.18285e-08	2.06261e-05
AT5G40830	342.88	0.72747	0.135418	5.37204	7.7852e-08	2.20655e-05
AT5G25260	131.57	0.965439	0.180071	5.36145	8.25576e-08	2.30992e-05
AT1G49860	873.05	0.780719	0.145713	5.35792	8.41836e-08	2.3256e-05
AT4G25710	280.389	0.752735	0.140737	5.34852	8.86766e-08	2.4191e-05
AT4G22950	97.634	0.962115	0.180805	5.32128	1.03038e-07	2.77617e-05
AT3G45130	127.051	0.963943	0.181402	5.31385	1.07334e-07	2.85665e-05
AT4G29700	837.203	0.806325	0.151855	5.30982	1.09732e-07	2.8853e-05
AT4G22720	260.746	0.740136	0.140681	5.2611	1.43199e-07	3.72046e-05
AT5G40010	131.512	0.894437	0.170825	5.23598	1.64116e-07	4.21373e-05
AT1G68880	305.548	0.730532	0.139596	5.23319	1.66606e-07	4.22792e-05
AT4G22280	53.6873	-0.91832	0.175967	-5.21871	1.80173e-07	4.51965e-05
AT3G02100	47.3588	0.808043	0.155191	5.20675	1.92176e-07	4.76596e-05
AT1G52790	79.3708	0.907534	0.175582	5.16873	2.35684e-07	5.77929e-05
AT4G19840	722.207	-0.597362	0.115672	-5.16427	2.41382e-07	5.85325e-05
AT4G23670	10855.3	-0.603501	0.117203	-5.14921	2.61585e-07	6.20815e-05
AT1G34510	99.5558	-0.931225	0.180851	-5.14912	2.61707e-07	6.20815e-05
AT4G29690	1204.28	-0.72751	0.141421	-5.14429	2.68538e-07	6.30169e-05
AT5G26260	6958.82	-0.49885	0.097477	-5.11761	3.09429e-07	7.18401e-05
AT5G65020	4535.86	-0.470353	0.0921987	-5.10151	3.36951e-07	7.74066e-05
AT1G14240	535.467	-0.699478	0.137333	-5.09329	3.51904e-07	7.99994e-05
AT4G23250	18.7629	0.818366	0.161323	5.07284	3.91914e-07	8.81767e-05
AT4G23510	127.843	0.85994	0.170462	5.04475	4.54113e-07	0.000101128
AT2G23270	83.4847	0.896778	0.177995	5.03823	4.69861e-07	0.000103578
AT5G45060	210.392	0.677054	0.134996	5.01535	5.29359e-07	0.000114384
AT4G31370	20.7001	-0.820074	0.163479	-5.01637	5.26559e-07	0.000114384
AT5G24780	779.561	-0.768156	0.153386	-5.008	5.49995e-07	0.000117677
AT1G26380	479.209	0.896757	0.179536	4.99487	5.88758e-07	0.000124748
AT5G40780	1261	-0.652444	0.130708	-4.99163	5.9871e-07	0.000125637
AT1G30210	167.961	0.827983	0.166185	4.98229	6.2836e-07	0.000130603
AT2G44450	814.219	-0.664196	0.133816	-4.96351	6.92315e-07	0.000142539
AT4G02380	3412.91	0.691005	0.140174	4.9296	8.23969e-07	0.000166503
AT4G28650	308.406	-0.669318	0.135736	-4.93104	8.17931e-07	0.000166503
AT2G30770	48.5095	0.774959	0.158852	4.87848	1.06905e-06	0.000214045
AT4G14020	176.407	-0.80118	0.164677	-4.86516	1.14363e-06	0.000226896
AT1G49320	375.692	0.637881	0.132435	4.81656	1.46057e-06	0.000287167
AT1G01560	45.1618	0.873138	0.181396	4.81343	1.4836e-06	0.00028909
AT5G41300	26.748	0.784242	0.164567	4.7655	1.88386e-06	0.000361714
AT3G61390	261.849	0.727449	0.152668	4.7649	1.88945e-06	0.000361714
AT1G02920	4693.51	0.826505	0.174909	4.72534	2.29732e-06	0.000430976
AT1G66200	35702.8	0.717761	0.151934	4.72418	2.31049e-06	0.000430976
AT4G12170	35.487	-0.846583	0.179185	-4.72464	2.30522e-06	0.000430976
AT2G03600	32.7335	-0.853404	0.181389	-4.70483	2.54074e-06	0.000469908
AT4G30993	163.959	0.748977	0.159312	4.70132	2.5849e-06	0.000474057
AT4G22214	178.118	0.846573	0.181367	4.66774	3.04527e-06	0.000549255
AT3G51340	84.947	0.792881	0.169831	4.66864	3.03203e-06	0.000549255
AT5G40080	204.727	-0.723597	0.155721	-4.64674	3.37222e-06	0.00060324
AT2G44210	160.47	-0.677321	0.146472	-4.62424	3.75972e-06	0.000667091
AT3G27170	640.181	0.757964	0.164234	4.61515	3.92818e-06	0.00069136
AT2G39510	431.307	0.832576	0.181263	4.59318	4.36537e-06	0.00076216
AT1G53625	454.912	0.749504	0.163616	4.58088	4.63025e-06	0.000801988
AT1G51890	573.275	0.500917	0.109673	4.56738	4.93869e-06	0.000848677
AT5G13320	86.5075	0.827864	0.181329	4.56553	4.98227e-06	0.000849478
AT5G38340	145.069	0.783486	0.171823	4.55984	5.11936e-06	0.000859423
AT2G44390	9.87597	0.65962	0.144626	4.56086	5.09444e-06	0.000859423
AT2G02400	317.181	-0.611006	0.134225	-4.55211	5.31114e-06	0.000884811
AT1G64400	321.051	0.625343	0.137762	4.53928	5.64457e-06	0.000933236
AT4G25390	199.95	0.730718	0.162907	4.48548	7.27497e-06	0.00119375
AT4G27960	1973.16	0.49111	0.10957	4.48213	7.39e-06	0.00120358
AT4G01970	178.179	0.748646	0.167371	4.47298	7.7136e-06	0.00124698
AT3G26460	900.233	-0.529129	0.118388	-4.46945	7.84206e-06	0.00125842
AT2G13810	89.4552	0.804865	0.180896	4.44931	8.61455e-06	0.00137229
AT5G47990	3415.43	-0.743727	0.167716	-4.43444	9.23117e-06	0.00145986
AT1G44800	3190.02	0.689941	0.155719	4.43069	9.3933e-06	0.00147481
AT5G40610	284.723	0.586262	0.132811	4.41424	1.01366e-05	0.00158015
AT1G26410	185.512	0.795188	0.181369	4.38437	1.16324e-05	0.00180047
AT4G34131	1142.31	0.629383	0.143705	4.37969	1.1885e-05	0.0018266
AT2G46180	370.677	0.54245	0.124033	4.37344	1.22306e-05	0.00186658
AT5G38020	1608.73	0.694504	0.158867	4.37161	1.23332e-05	0.00186917
AT3G28510	125.687	0.772265	0.177124	4.36003	1.30046e-05	0.00195733
AT5G42650	302.016	-0.57142	0.131412	-4.34832	1.37183e-05	0.00204875
AT5G37980	40.4508	-0.786318	0.180887	-4.34702	1.37998e-05	0.00204875
AT1G19250	110.956	0.76585	0.176271	4.34474	1.39443e-05	0.00205622
AT2G28270	46.0401	0.779805	0.179889	4.33492	1.45811e-05	0.00213569
AT3G29250	2243.41	-0.596099	0.138057	-4.31779	1.57602e-05	0.00229301
AT1G21100	1767.61	-0.556151	0.129141	-4.30653	1.65832e-05	0.00239677
AT2G39310	3946.17	-0.632349	0.147016	-4.30123	1.69853e-05	0.00243873
AT1G24420	93.3658	0.758332	0.176434	4.29811	1.72258e-05	0.00245449
AT5G42930	56.0369	-0.761621	0.177249	-4.2969	1.732e-05	0.00245449
AT4G10530	16.8334	0.721622	0.168018	4.2949	1.74775e-05	0.00246084
AT1G14550	121.812	0.716444	0.167827	4.26895	1.96399e-05	0.00274758
AT4G24350	159.776	-0.771291	0.181284	-4.2546	2.0942e-05	0.00291108
AT5G23830	1129.11	-0.587856	0.138863	-4.23336	2.30222e-05	0.00317998
AT4G31860	759.161	0.638697	0.151247	4.22288	2.41197e-05	0.00328992
AT1G30760	371.126	-0.643842	0.152425	-4.22399	2.40018e-05	0.00328992
AT5G38000	63.5545	0.759469	0.181024	4.19541	2.72384e-05	0.00366945
AT4G25900	1376.93	0.548307	0.130666	4.19624	2.7138e-05	0.00366945
AT1G77380	321.281	-0.75275	0.179994	-4.18207	2.88861e-05	0.00386755
AT4G11880	442.37	0.752923	0.180185	4.17862	2.93285e-05	0.00387918
AT4G23690	1813.28	-0.486532	0.116425	-4.17892	2.92901e-05	0.00387918
AT4G15393	750.924	0.598656	0.143387	4.17511	2.97837e-05	0.00391566
AT2G44180	628.225	0.464129	0.111323	4.16921	3.05659e-05	0.00399444
AT4G21380	53.7312	0.755423	0.181404	4.16432	3.12286e-05	0.00405674
AT5G57220	793.19	0.729693	0.17529	4.16279	3.14386e-05	0.00405986
AT5G47980	481.858	-0.713543	0.171603	-4.1581	3.20911e-05	0.00411974
AT1G77760	1140.07	0.741996	0.179349	4.13716	3.51626e-05	0.00448765
AT3G20160	37.1067	-0.73418	0.178216	-4.11962	3.79503e-05	0.00481527
AT4G04830	2723.34	-0.408679	0.0995274	-4.1062	4.02226e-05	0.00507409
AT5G09600	108.999	-0.701793	0.171621	-4.08919	4.32883e-05	0.00542945
AT5G23990	448.309	0.734849	0.179939	4.08389	4.42882e-05	0.00552311
AT4G28410	329.052	-0.606573	0.148953	-4.07225	4.65603e-05	0.00577348
AT4G34103	7.11056	-0.549755	0.135114	-4.06882	4.72515e-05	0.00582608
AT1G01190	330.012	0.598644	0.147472	4.05938	4.92041e-05	0.00603276
AT5G41280	8.58499	0.577461	0.142351	4.05659	4.97945e-05	0.00603731
AT3G05950	50.5278	-0.709171	0.174819	-4.0566	4.97912e-05	0.00603731
AT2G42160	310.431	0.539643	0.133102	4.05436	5.02726e-05	0.0060616
AT1G69526	181.743	-0.641105	0.15897	-4.03288	5.50973e-05	0.00660683
AT2G44070	7.14121	-0.540105	0.134143	-4.02633	5.66546e-05	0.00671972
AT4G24340	331.755	-0.713635	0.177214	-4.02697	5.64994e-05	0.00671972
AT4G29050	21.8779	0.71598	0.178842	4.00342	6.24328e-05	0.00736504
AT1G13710	68.135	0.71467	0.179407	3.98351	6.79051e-05	0.00796753
AT5G37950	6.82086	-0.543509	0.136714	-3.97553	7.02215e-05	0.00819526
AT5G10970	139.484	0.633992	0.159646	3.97123	7.15018e-05	0.00830029
AT2G44480	116.703	0.66249	0.16707	3.96533	7.3293e-05	0.00846321
AT1G66800	472.446	-0.646948	0.163457	-3.95791	7.56088e-05	0.00868467
AT5G26920	370.244	0.674218	0.17049	3.9546	7.66636e-05	0.00875972
AT4G23260	15.0318	0.635934	0.161009	3.94969	7.82529e-05	0.00885309
AT1G62310	179.14	0.571086	0.144594	3.94957	7.82921e-05	0.00885309
AT5G38930	12.7555	-0.52545	0.133123	-3.94709	7.91066e-05	0.00889908
AT5G39670	237.82	0.712948	0.180853	3.94214	8.0759e-05	0.00903839
AT3G29120	23.1829	0.687801	0.174888	3.93282	8.39551e-05	0.00930069
AT5G06900	135.79	0.572335	0.145519	3.93306	8.38729e-05	0.00930069
AT4G25810	136.483	0.707915	0.18023	3.92785	8.5708e-05	0.00944693
AT4G30910	556.126	-0.498665	0.127183	-3.92086	8.8233e-05	0.00967637
AT1G06620	634.493	-0.483271	0.123703	-3.9067	9.35654e-05	0.0101653
AT5G48000	2244.93	-0.623839	0.159691	-3.90655	9.36229e-05	0.0101653
AT2G02300	23.8798	0.693959	0.177959	3.89954	9.6377e-05	0.0104125
AT3G50480	38.6002	0.704913	0.181126	3.89184	9.94871e-05	0.0106956
AT1G26390	997.974	0.669139	0.172	3.89034	0.000100103	0.010709
AT5G53460	22157.3	0.530385	0.13642	3.88787	0.000101128	0.0107659
AT3G61490	230.278	-0.53114	0.136758	-3.88379	0.000102841	0.0108952
AT2G05440	28015.2	0.345359	0.0893329	3.86598	0.000110642	0.011665
AT2G43000	153.969	0.699035	0.181101	3.85993	0.00011342	0.0118434
AT5G58360	95.3987	0.648181	0.167913	3.86021	0.000113289	0.0118434
AT3G46530	31.2245	0.69844	0.181404	3.85018	0.000118029	0.012266
AT1G65481	60.8267	0.693994	0.180353	3.84798	0.000119097	0.0123184
AT4G30120	193.149	-0.690492	0.180916	-3.81664	0.000135283	0.0139265
AT4G11170	79.9763	0.689532	0.180926	3.81113	0.000138333	0.0141736
AT4G18390	107.117	0.682643	0.179283	3.80764	0.000140302	0.0143082
AT4G37220	20.6899	-0.609018	0.16015	-3.8028	0.000143069	0.0145225
AT3G13760	273.46	0.579732	0.152595	3.79917	0.000145184	0.014669
AT4G25240	472.168	0.446605	0.117629	3.79672	0.000146626	0.0147464
AT2G02630	50.2664	0.685837	0.180949	3.79022	0.000150512	0.0150677
AT3G16400	10312.1	-0.507475	0.134044	-3.78588	0.000153166	0.0152635
AT5G40730	2568.36	-0.515292	0.136219	-3.78281	0.000155071	0.015383
AT1G12110	3778.4	0.613547	0.162927	3.76578	0.000166031	0.0163957
AT4G32220	7.56967	-0.517102	0.137676	-3.75592	0.000172706	0.0169781
AT4G32210	128.539	0.595289	0.158891	3.74651	0.000179311	0.0175484
AT4G31460	805.62	-0.401134	0.107511	-3.7311	0.000190647	0.0185745
AT1G52800	119.117	0.663422	0.17793	3.72855	0.000192583	0.018597
AT2G44620	1677.69	-0.395764	0.106115	-3.72959	0.000191792	0.018597
AT1G05880	58.7122	0.671499	0.180369	3.72291	0.000196938	0.0189338
AT2G27402	130.863	0.672647	0.180978	3.71674	0.000201809	0.0192467
AT4G22010	1503.68	-0.508653	0.136861	-3.71656	0.000201956	0.0192467
AT1G78000	3930.8	0.535678	0.144231	3.71403	0.000203983	0.0193325
AT3G16450	11230.1	-0.502813	0.135411	-3.71323	0.000204628	0.0193325
AT2G30750	2405.95	0.649636	0.175174	3.70853	0.000208467	0.0196102
AT3G21550	154.511	-0.570823	0.154309	-3.69922	0.000216261	0.0202562
AT2G17060	102.282	0.660841	0.179005	3.69175	0.000222719	0.0206835
AT1G52820	877.662	0.576207	0.156048	3.6925	0.000222062	0.0206835
AT4G31700	11312.2	-0.384857	0.104336	-3.68862	0.000225475	0.0208507
AT1G22890	56.5792	0.630754	0.171202	3.68427	0.000229359	0.0210401
AT4G34760	160.396	0.536733	0.145686	3.68417	0.000229451	0.0210401
AT4G28790	44.3407	0.663661	0.180568	3.67541	0.000237472	0.0216845
AT1G32100	563.7	-0.440536	0.119934	-3.67317	0.000239563	0.0217843
AT2G44010	242.924	0.549583	0.150427	3.65349	0.000258695	0.0234264
AT3G30260	18.0973	0.638886	0.175243	3.64571	0.000266654	0.0240293
AT4G39770	431.852	0.526529	0.144459	3.64484	0.000267555	0.0240293
AT1G29025	997.867	-0.505989	0.139525	-3.62651	0.000287275	0.0256946
AT1G26240	135.224	0.656427	0.181402	3.61862	0.000296174	0.0260633
AT4G31970	532.813	0.653844	0.180643	3.61953	0.000295135	0.0260633
AT3G14660	1557.95	0.452379	0.124955	3.62035	0.000294208	0.0260633
AT2G37870	18.2957	-0.619918	0.171218	-3.62063	0.000293887	0.0260633
AT5G35935	206.776	-0.552317	0.152692	-3.61721	0.0002978	0.0261012
AT1G26420	160.849	0.622547	0.172429	3.61045	0.000305666	0.0266835
AT5G25250	242.956	0.609083	0.168807	3.60816	0.000308373	0.0268125
AT2G43470	15.8544	0.570944	0.158908	3.59292	0.000326991	0.0281741
AT5G40840	195.518	0.49968	0.13906	3.59326	0.000326569	0.0281741
AT4G25020	7.90098	0.485534	0.135164	3.59219	0.000327906	0.0281741
AT4G27350	298.824	-0.508463	0.141651	-3.58955	0.000331246	0.0283495
AT3G17820	2624.86	-0.338916	0.0946847	-3.57942	0.000344364	0.029357
AT1G19110	1080.98	0.422966	0.11831	3.57505	0.000350159	0.0297349
AT5G39580	398.566	0.607902	0.1702	3.57169	0.000354689	0.0300028
AT5G41080	3406.34	0.478123	0.134198	3.56281	0.000366903	0.0309161
AT5G37790	681.88	0.400851	0.112936	3.54937	0.000386148	0.0324127
AT4G23870	198.122	0.579479	0.163785	3.53806	0.000403085	0.0334484
AT1G15540	93.0224	0.459383	0.129805	3.53904	0.00040159	0.0334484
AT1G17190	2496.46	-0.469454	0.132638	-3.53937	0.000401083	0.0334484
AT1G68238	170.443	0.575	0.162623	3.53578	0.000406573	0.0335987
AT4G29750	251.824	0.506583	0.14335	3.53387	0.000409515	0.0335987
AT1G73120	784.969	-0.628979	0.177964	-3.5343	0.000408861	0.0335987
AT4G24275	188.42	-0.546036	0.155123	-3.52002	0.000431519	0.0352715
AT2G02590	94.112	-0.601932	0.171776	-3.50416	0.000458051	0.0373004
AT1G49160	384.87	0.45023	0.128705	3.49816	0.000468487	0.0380084
AT5G40290	5.30774	-0.432177	0.123596	-3.4967	0.000471049	0.0380747
AT3G51330	1487.24	0.367431	0.105195	3.49286	0.000477882	0.0384845
AT5G66170	790.779	-0.546109	0.156471	-3.49017	0.000482709	0.0387303
AT5G21280	132.64	-0.539521	0.15467	-3.48821	0.000486269	0.038873
AT3G19680	297.817	-0.503514	0.144482	-3.48496	0.000492218	0.039205
AT2G15220	957.665	0.528692	0.151778	3.48333	0.000495208	0.0392997
AT4G09420	78.9064	0.582499	0.167543	3.47671	0.000507612	0.0401381
AT3G18773	198.275	0.541933	0.156046	3.47291	0.000514857	0.040564
AT3G62860	307.371	-0.518218	0.149281	-3.47142	0.000517707	0.0406419
AT5G65980	58.3862	0.621696	0.179395	3.46552	0.00052921	0.041396
AT1G21210	61.499	0.626916	0.181221	3.45941	0.000541362	0.0421953
AT4G31000	220.095	0.570476	0.165248	3.45225	0.000555942	0.0431775
AT4G28150	55.417	0.618355	0.17929	3.44891	0.000562853	0.0435592
AT2G26980	1592.86	0.320625	0.0931477	3.44211	0.000577192	0.0445111
AT4G32670	132.13	0.536587	0.155992	3.43985	0.000582047	0.0447274
AT5G41150	280.142	0.46112	0.134179	3.4366	0.000589059	0.0449497
AT3G62020	150.75	-0.516234	0.150205	-3.43686	0.000588489	0.0449497
AT2G28960	761.391	0.487891	0.142446	3.42509	0.000614603	0.0467356
AT3G54420	553.037	0.415815	0.121626	3.41879	0.000628997	0.047664
AT5G38830	1016.77	0.32821	0.096128	3.41431	0.000639443	0.0482879
AT5G10030	687.675	0.457445	0.134389	3.40389	0.000664329	0.0499942

## Sheet: yang 2011
AT2G47520
AT4G30380
AT2G29870
AT2G34390
AT5G10040
AT4G37710
AT5G48430
AT1G43800
AT3G29970
AT3G03670
AT2G47560
AT1G26420
AT2G43140
AT1G14540
AT3G43190
AT4G24110
AT1G76650
AT4G33560
AT4G33070
AT4G31970
AT2G17850
AT3G27980
AT5G57220
AT5G37450
AT5G39890
AT1G66930
AT2G26820
AT5G62520
AT1G59500
AT4G37390
AT1G72540
AT1G49030
AT1G26410
AT1G36640
AT2G40330
AT1G49000
AT1G52560
AT5G13320
AT2G44370
AT5G03390
AT1G35140
AT2G23270
AT3G23170
AT5G22555
AT1G57630
AT4G10270
AT3G02240
AT5G59680
AT5G39580
AT3G53820
AT2G39510
AT2G28270
AT1G07400
AT1G59860
AT5G65600
AT4G19520
AT5G20230
AT2G41730
AT5G26920
AT2G26560
AT1G72360
AT5G25250
AT5G25260
AT3G18250
AT5G57510
AT1G33840
AT1G05700
AT4G25200
AT5G43520
AT5G38930
AT5G38940
AT2G26150
AT1G14550
AT1G44050
AT1G65390
AT2G42060
AT1G19250
AT1G06830
AT2G16060
AT5G26200
AT2G44800
AT5G28630
AT3G10040
AT1G26380
AT3G55790
AT1G21120
AT1G05880
AT1G69920
AT1G77120
AT5G66985
AT4G13790
AT5G44730
AT5G64905
AT2G19590
AT2G37430
AT2G41230
AT5G12030
AT5G54470
AT1G53620
AT1G59530
AT2G02620
AT1G26240
AT4G27670
AT2G41100
AT3G03270
AT4G37370
AT3G51350
AT5G40590
AT4G14630
AT4G18950
AT1G21130
AT2G40340
AT2G40350
AT2G22880
AT5G52670
AT3G27220
AT5G01740
AT1G80840
AT1G51915
AT2G40750
AT5G49770
AT4G33050
AT1G22810
AT1G64160
AT3G48850
AT2G25735
AT3G28510
AT5G12020
AT1G12100
AT5G12340
AT5G24070
AT5G12180
AT2G36690
AT5G57560
AT1G72060
AT2G18970
AT3G46230
AT1G72920
AT4G21870
AT5G62150
AT4G18170
AT1G77150
AT1G77170
AT2G39530
AT1G68690
AT1G26250
AT1G26290
AT5G22270
AT3G52450
AT2G35710
AT1G49860
AT4G28460
AT2G04040
AT3G02840
AT1G69930
AT4G21380
AT2G26400
AT2G26530
AT3G57770
AT5G45090
AT5G67080
AT4G18280
AT1G76640
AT4G01250
AT4G11230
AT1G27730
AT3G27950
AT1G30700
AT3G02550
AT1G71000
AT3G53600
AT1G70920
AT5G06740
AT1G66690
AT1G66700
AT3G28210
AT3G46730
AT2G28755
AT4G17260
AT1G53990
AT4G19370
AT1G50090
AT1G18970
AT4G10250
AT1G69523
AT5G15120
AT1G29670
AT1G15890
AT1G51890
AT3G16150
AT5G41280
AT1G52200
AT1G67980
AT1G08090
AT1G35910
AT3G23230
AT4G25420
AT4G14980
AT5G48540
AT1G13110
AT4G24120
AT3G20030
AT1G66500
AT5G43620
AT2G27660
AT5G19550
AT1G66880
AT3G12700
AT5G51440
AT2G28970
AT4G22780
AT2G21900
AT5G28610
AT1G13540
AT5G04310
AT1G53540
AT1G01340
AT4G21400
AT5G20830
AT3G23250
AT2G44840
AT1G21210
AT1G63090
AT2G15830
AT2G34400
AT1G74310
AT4G17490
AT3G54420
AT3G17690
AT2G45380
AT5G53970
AT2G44080
AT5G60760
AT1G33600
AT1G07160
AT4G09110
AT4G23260
AT1G05575
AT2G29500
AT2G38870
AT1G69880
AT4G08740
AT1G54050
AT2G23680
AT3G63380
AT1G11330
AT3G46280
AT2G23170
AT1G02430
AT1G02440
AT4G37900
AT5G45340
AT5G07390
AT1G80450
AT2G38240
AT1G69570
AT1G31885
AT5G35380
AT4G31020
AT2G42440
AT4G39670
AT4G08770
AT1G37130
AT1G77210
AT1G62840
AT5G14760
AT4G39675
AT5G05440
AT4G36500
AT3G47480
AT3G13610
AT3G09940
AT3G45920
AT3G46330
AT1G33870
AT4G25380
AT5G45080
AT2G28960
AT5G22570
AT5G64870
AT4G22530
AT1G13370
AT4G37430
AT5G46295
AT5G48350
AT2G47720
AT2G47730
AT2G19420
AT2G32020
AT2G01430

## Sheet: Tabelle3
GeneID	Base mean	log2(FC)	StdErr	Wald-Stats	P-value	P-adj
AT2G43590	1464.33	4.56485	0.165886	27.518	1.06789e-166	2.33056e-162	FALSE
AT4G24420	239.137	-3.47386	0.168982	-20.5575	6.59408e-94	7.19546e-90	FALSE
AT5G38005	88.6294	2.88919	0.178896	16.1501	1.1338e-58	8.24805e-55	FALSE
AT5G38350	86.3452	2.70707	0.177176	15.279	1.0555e-52	5.75881e-49	FALSE
AT4G25100	5142.87	1.41747	0.0971596	14.5891	3.29393e-48	1.43773e-44	FALSE
AT4G27050	671.662	-1.59027	0.110716	-14.3635	8.76957e-47	3.18978e-43	FALSE
AT4G32230	65.6725	-2.41359	0.181357	-13.3085	2.06594e-40	6.44101e-37	FALSE
AT4G29770	59.0254	-2.40688	0.181036	-13.2951	2.47297e-40	6.74626e-37	FALSE
AT2G43620	198.332	-2.08165	0.162517	-12.8088	1.46379e-37	3.54953e-34	FALSE
AT2G02360	158.074	2.04503	0.160258	12.7609	2.71182e-37	5.91828e-34	FALSE
AT4G29760	52.1142	-2.25697	0.181387	-12.4429	1.52935e-35	3.03424e-32	FALSE
AT5G66380	355.181	-1.493	0.131357	-11.3659	6.18046e-30	1.12402e-26	FALSE
AT2G44220	56.0016	-1.99944	0.181399	-11.0224	2.98088e-28	5.0042e-25	FALSE
AT4G22350	305.886	-1.46753	0.134624	-10.901	1.14038e-27	1.7777e-24	FALSE
AT2G44370	1033.77	-1.15942	0.108053	-10.7301	7.35258e-27	9.66167e-24	TRUE
AT4G22235	242.998	-1.63426	0.152245	-10.7344	7.01734e-27	9.66167e-24	FALSE
AT4G28900	40.0358	1.94258	0.181077	10.7279	7.52605e-27	9.66167e-24	FALSE
AT5G38910	286.303	1.66652	0.157343	10.5916	3.25884e-26	3.95117e-23	FALSE
AT5G38590	259.607	-1.36906	0.131863	-10.3825	2.97995e-25	3.42286e-22	FALSE
AT4G22460	156.776	1.57311	0.155359	10.1256	4.25309e-24	4.64097e-21	FALSE
AT4G27890	30.7184	-1.73928	0.179459	-9.6918	3.26729e-22	3.3955e-19	FALSE
AT2G16005	902.521	-1.31686	0.139327	-9.45158	3.33756e-21	3.31086e-18	FALSE
AT2G02960	896.365	1.03215	0.111291	9.27434	1.78727e-20	1.69588e-17	FALSE
AT4G22960	64.7758	-1.49617	0.176404	-8.48148	2.22343e-17	2.02184e-14	FALSE
AT5G40990	50.7545	1.50507	0.180248	8.35001	6.82559e-17	5.95847e-14	FALSE
AT4G27080	1297.81	-0.876183	0.105973	-8.26795	1.36282e-16	1.14393e-13	FALSE
AT5G39770	24.2027	-1.44578	0.176165	-8.20694	2.26903e-16	1.83405e-13	FALSE
AT5G38540	52.8176	1.45783	0.181116	8.04916	8.33616e-16	6.49744e-13	FALSE
AT3G52970	107.636	1.36736	0.17541	7.79522	6.42983e-15	4.83878e-12	FALSE
AT4G29905	1602.58	0.958037	0.12682	7.55432	4.21063e-14	3.06309e-11	FALSE
AT5G40950	433.114	0.963567	0.128019	7.52678	5.20063e-14	3.66125e-11	FALSE
AT2G02250	36.7305	-1.3193	0.179098	-7.36632	1.75401e-13	1.19624e-10	FALSE
AT5G41140	675.726	0.955302	0.132387	7.216	5.35376e-13	3.54062e-10	FALSE
AT5G38030	591.891	1.15298	0.161281	7.14891	8.74694e-13	5.61451e-10	FALSE
AT3G51350	439.846	0.843728	0.121034	6.97098	3.14742e-12	1.96255e-09	TRUE
AT4G22410	18.7656	-1.1701	0.168074	-6.96181	3.35927e-12	2.03646e-09	FALSE
AT4G30140	543.764	1.0029	0.144443	6.94318	3.83379e-12	2.26131e-09	FALSE
AT4G22230	354.375	-1.23001	0.177253	-6.9393	3.94049e-12	2.26309e-09	FALSE
AT4G25400	406.662	1.06709	0.155764	6.85067	7.35044e-12	4.11323e-09	FALSE
AT1G68040	37.3915	1.20133	0.175849	6.83158	8.3986e-12	4.47051e-09	FALSE
AT5G40910	488.586	0.807505	0.118157	6.83418	8.24733e-12	4.47051e-09	FALSE
AT2G42270	519.925	0.925593	0.138576	6.67931	2.40067e-11	1.24743e-08	FALSE
AT5G39100	28.0581	-1.1319	0.169844	-6.66435	2.65838e-11	1.34922e-08	FALSE
AT2G44230	186.326	1.1319	0.173826	6.51166	7.43273e-11	3.60471e-08	FALSE
AT5G39800	89.0575	1.08453	0.166489	6.51408	7.31349e-11	3.60471e-08	FALSE
AT4G27400	44.792	1.17336	0.181351	6.47014	9.79105e-11	4.64521e-08	FALSE
AT2G43535	2723.8	-0.672806	0.104777	-6.42134	1.35081e-10	6.27237e-08	FALSE
AT5G41370	615.201	0.742747	0.115784	6.41494	1.40882e-10	6.40544e-08	FALSE
AT5G37990	2240.39	0.977718	0.152958	6.39205	1.6368e-10	7.29011e-08	FALSE
AT4G33880	191.512	0.941078	0.147302	6.38877	1.67224e-10	7.299e-08	FALSE
AT5G24140	178.492	-1.13263	0.177525	-6.3801	1.76974e-10	7.57311e-08	FALSE
AT5G38344	17.6981	1.08863	0.171299	6.35512	2.08263e-10	8.74063e-08	FALSE
AT4G23980	554.318	0.870211	0.138145	6.29926	2.99069e-10	1.23149e-07	FALSE
AT4G38240	490.645	0.697023	0.110862	6.28729	3.2306e-10	1.30564e-07	FALSE
AT3G62040	3928.04	0.541445	0.0868319	6.23555	4.50195e-10	1.78637e-07	FALSE
AT5G23820	1734.88	-0.684165	0.110113	-6.21331	5.18787e-10	2.02179e-07	FALSE
AT4G24920	1563.42	0.648502	0.105089	6.17097	6.78704e-10	2.5986e-07	FALSE
AT5G37830	944.851	0.73594	0.121289	6.06766	1.29787e-09	4.88356e-07	FALSE
AT2G42250	144.841	1.07113	0.177333	6.0402	1.53925e-09	5.69364e-07	FALSE
AT5G40920	194.457	-0.90345	0.15047	-6.00419	1.92286e-09	6.99407e-07	FALSE
AT2G02690	15.1657	0.969359	0.161789	5.99149	2.07928e-09	7.43904e-07	FALSE
AT1G49310	573.815	0.726421	0.123744	5.87037	4.34814e-09	1.53054e-06	FALSE
AT2G43570	788.947	1.01282	0.176594	5.7353	9.73384e-09	3.31924e-06	FALSE
AT4G29740	241.632	1.01301	0.176582	5.73677	9.65017e-09	3.31924e-06	FALSE
AT4G23700	1337.82	0.867767	0.152472	5.69132	1.26062e-08	4.23258e-06	FALSE
AT2G02310	20.3701	0.971084	0.174548	5.56343	2.64525e-08	8.74697e-06	FALSE
AT5G36870	53.7667	1.00552	0.181162	5.55041	2.84994e-08	9.28315e-06	FALSE
AT5G38010	146.481	0.982957	0.177603	5.53459	3.11959e-08	1.0012e-05	FALSE
AT2G02800	936.368	0.634857	0.114839	5.52822	3.23499e-08	1.02319e-05	FALSE
AT5G40370	1862.18	-0.539263	0.0979592	-5.50498	3.69212e-08	1.1511e-05	FALSE
AT4G27070	396.325	-0.728232	0.13308	-5.47215	4.44611e-08	1.35436e-05	FALSE
AT5G59700	235.689	0.735151	0.134366	5.47127	4.46819e-08	1.35436e-05	FALSE
AT5G65210	5036.49	0.4656	0.0852928	5.45885	4.7924e-08	1.43273e-05	FALSE
AT5G23660	67.5676	-0.977926	0.180469	-5.41881	5.99977e-08	1.76945e-05	FALSE
AT2G03070	198.377	0.763778	0.141549	5.39585	6.81984e-08	1.98448e-05	FALSE
AT5G19600	483.605	0.875123	0.162465	5.38654	7.18285e-08	2.06261e-05	FALSE
AT5G40830	342.88	0.72747	0.135418	5.37204	7.7852e-08	2.20655e-05	FALSE
AT5G25260	131.57	0.965439	0.180071	5.36145	8.25576e-08	2.30992e-05	TRUE
AT1G49860	873.05	0.780719	0.145713	5.35792	8.41836e-08	2.3256e-05	TRUE
AT4G25710	280.389	0.752735	0.140737	5.34852	8.86766e-08	2.4191e-05	FALSE
AT4G22950	97.634	0.962115	0.180805	5.32128	1.03038e-07	2.77617e-05	FALSE
AT3G45130	127.051	0.963943	0.181402	5.31385	1.07334e-07	2.85665e-05	FALSE
AT4G29700	837.203	0.806325	0.151855	5.30982	1.09732e-07	2.8853e-05	FALSE
AT4G22720	260.746	0.740136	0.140681	5.2611	1.43199e-07	3.72046e-05	FALSE
AT5G40010	131.512	0.894437	0.170825	5.23598	1.64116e-07	4.21373e-05	FALSE
AT1G68880	305.548	0.730532	0.139596	5.23319	1.66606e-07	4.22792e-05	FALSE
AT4G22280	53.6873	-0.91832	0.175967	-5.21871	1.80173e-07	4.51965e-05	FALSE
AT3G02100	47.3588	0.808043	0.155191	5.20675	1.92176e-07	4.76596e-05	FALSE
AT1G52790	79.3708	0.907534	0.175582	5.16873	2.35684e-07	5.77929e-05	FALSE
AT4G19840	722.207	-0.597362	0.115672	-5.16427	2.41382e-07	5.85325e-05	FALSE
AT1G34510	99.5558	-0.931225	0.180851	-5.14912	2.61707e-07	6.20815e-05	FALSE
AT4G23670	10855.3	-0.603501	0.117203	-5.14921	2.61585e-07	6.20815e-05	FALSE
AT4G29690	1204.28	-0.72751	0.141421	-5.14429	2.68538e-07	6.30169e-05	FALSE
AT5G26260	6958.82	-0.49885	0.097477	-5.11761	3.09429e-07	7.18401e-05	FALSE
AT5G65020	4535.86	-0.470353	0.0921987	-5.10151	3.36951e-07	7.74066e-05	FALSE
AT1G14240	535.467	-0.699478	0.137333	-5.09329	3.51904e-07	7.99994e-05	FALSE
AT4G23250	18.7629	0.818366	0.161323	5.07284	3.91914e-07	8.81767e-05	FALSE
AT4G23510	127.843	0.85994	0.170462	5.04475	4.54113e-07	0.000101128	FALSE
AT2G23270	83.4847	0.896778	0.177995	5.03823	4.69861e-07	0.000103578	TRUE
AT4G31370	20.7001	-0.820074	0.163479	-5.01637	5.26559e-07	0.000114384	FALSE
AT5G45060	210.392	0.677054	0.134996	5.01535	5.29359e-07	0.000114384	FALSE
AT5G24780	779.561	-0.768156	0.153386	-5.008	5.49995e-07	0.000117677	FALSE
AT1G26380	479.209	0.896757	0.179536	4.99487	5.88758e-07	0.000124748	TRUE
AT5G40780	1261	-0.652444	0.130708	-4.99163	5.9871e-07	0.000125637	FALSE
AT1G30210	167.961	0.827983	0.166185	4.98229	6.2836e-07	0.000130603	FALSE
AT2G44450	814.219	-0.664196	0.133816	-4.96351	6.92315e-07	0.000142539	FALSE
AT4G02380	3412.91	0.691005	0.140174	4.9296	8.23969e-07	0.000166503	FALSE
AT4G28650	308.406	-0.669318	0.135736	-4.93104	8.17931e-07	0.000166503	FALSE
AT2G30770	48.5095	0.774959	0.158852	4.87848	1.06905e-06	0.000214045	FALSE
AT4G14020	176.407	-0.80118	0.164677	-4.86516	1.14363e-06	0.000226896	FALSE
AT1G49320	375.692	0.637881	0.132435	4.81656	1.46057e-06	0.000287167	FALSE
AT1G01560	45.1618	0.873138	0.181396	4.81343	1.4836e-06	0.00028909	FALSE
AT3G61390	261.849	0.727449	0.152668	4.7649	1.88945e-06	0.000361714	FALSE
AT5G41300	26.748	0.784242	0.164567	4.7655	1.88386e-06	0.000361714	FALSE
AT1G02920	4693.51	0.826505	0.174909	4.72534	2.29732e-06	0.000430976	FALSE
AT1G66200	35702.8	0.717761	0.151934	4.72418	2.31049e-06	0.000430976	FALSE
AT4G12170	35.487	-0.846583	0.179185	-4.72464	2.30522e-06	0.000430976	FALSE
AT2G03600	32.7335	-0.853404	0.181389	-4.70483	2.54074e-06	0.000469908	FALSE
AT4G30993	163.959	0.748977	0.159312	4.70132	2.5849e-06	0.000474057	FALSE
AT3G51340	84.947	0.792881	0.169831	4.66864	3.03203e-06	0.000549255	FALSE
AT4G22214	178.118	0.846573	0.181367	4.66774	3.04527e-06	0.000549255	FALSE
AT5G40080	204.727	-0.723597	0.155721	-4.64674	3.37222e-06	0.00060324	FALSE
AT2G44210	160.47	-0.677321	0.146472	-4.62424	3.75972e-06	0.000667091	FALSE
AT3G27170	640.181	0.757964	0.164234	4.61515	3.92818e-06	0.00069136	FALSE
AT2G39510	431.307	0.832576	0.181263	4.59318	4.36537e-06	0.00076216	TRUE
AT1G53625	454.912	0.749504	0.163616	4.58088	4.63025e-06	0.000801988	FALSE
AT1G51890	573.275	0.500917	0.109673	4.56738	4.93869e-06	0.000848677	TRUE
AT5G13320	86.5075	0.827864	0.181329	4.56553	4.98227e-06	0.000849478	TRUE
AT2G44390	9.87597	0.65962	0.144626	4.56086	5.09444e-06	0.000859423	FALSE
AT5G38340	145.069	0.783486	0.171823	4.55984	5.11936e-06	0.000859423	FALSE
AT2G02400	317.181	-0.611006	0.134225	-4.55211	5.31114e-06	0.000884811	FALSE
AT1G64400	321.051	0.625343	0.137762	4.53928	5.64457e-06	0.000933236	FALSE
AT4G25390	199.95	0.730718	0.162907	4.48548	7.27497e-06	0.00119375	FALSE
AT4G27960	1973.16	0.49111	0.10957	4.48213	7.39e-06	0.00120358	FALSE
AT4G01970	178.179	0.748646	0.167371	4.47298	7.7136e-06	0.00124698	FALSE
AT3G26460	900.233	-0.529129	0.118388	-4.46945	7.84206e-06	0.00125842	FALSE
AT2G13810	89.4552	0.804865	0.180896	4.44931	8.61455e-06	0.00137229	FALSE
AT5G47990	3415.43	-0.743727	0.167716	-4.43444	9.23117e-06	0.00145986	FALSE
AT1G44800	3190.02	0.689941	0.155719	4.43069	9.3933e-06	0.00147481	FALSE
AT5G40610	284.723	0.586262	0.132811	4.41424	1.01366e-05	0.00158015	FALSE
AT1G26410	185.512	0.795188	0.181369	4.38437	1.16324e-05	0.00180047	TRUE
AT4G34131	1142.31	0.629383	0.143705	4.37969	1.1885e-05	0.0018266	FALSE
AT2G46180	370.677	0.54245	0.124033	4.37344	1.22306e-05	0.00186658	FALSE
AT5G38020	1608.73	0.694504	0.158867	4.37161	1.23332e-05	0.00186917	FALSE
AT3G28510	125.687	0.772265	0.177124	4.36003	1.30046e-05	0.00195733	TRUE
AT5G37980	40.4508	-0.786318	0.180887	-4.34702	1.37998e-05	0.00204875	FALSE
AT5G42650	302.016	-0.57142	0.131412	-4.34832	1.37183e-05	0.00204875	FALSE
AT1G19250	110.956	0.76585	0.176271	4.34474	1.39443e-05	0.00205622	TRUE
AT2G28270	46.0401	0.779805	0.179889	4.33492	1.45811e-05	0.00213569	TRUE
AT3G29250	2243.41	-0.596099	0.138057	-4.31779	1.57602e-05	0.00229301	FALSE
AT1G21100	1767.61	-0.556151	0.129141	-4.30653	1.65832e-05	0.00239677	FALSE
AT2G39310	3946.17	-0.632349	0.147016	-4.30123	1.69853e-05	0.00243873	FALSE
AT1G24420	93.3658	0.758332	0.176434	4.29811	1.72258e-05	0.00245449	FALSE
AT5G42930	56.0369	-0.761621	0.177249	-4.2969	1.732e-05	0.00245449	FALSE
AT4G10530	16.8334	0.721622	0.168018	4.2949	1.74775e-05	0.00246084	FALSE
AT1G14550	121.812	0.716444	0.167827	4.26895	1.96399e-05	0.00274758	TRUE
AT4G24350	159.776	-0.771291	0.181284	-4.2546	2.0942e-05	0.00291108	FALSE
AT5G23830	1129.11	-0.587856	0.138863	-4.23336	2.30222e-05	0.00317998	FALSE
AT1G30760	371.126	-0.643842	0.152425	-4.22399	2.40018e-05	0.00328992	FALSE
AT4G31860	759.161	0.638697	0.151247	4.22288	2.41197e-05	0.00328992	FALSE
AT4G25900	1376.93	0.548307	0.130666	4.19624	2.7138e-05	0.00366945	FALSE
AT5G38000	63.5545	0.759469	0.181024	4.19541	2.72384e-05	0.00366945	FALSE
AT1G77380	321.281	-0.75275	0.179994	-4.18207	2.88861e-05	0.00386755	FALSE
AT4G11880	442.37	0.752923	0.180185	4.17862	2.93285e-05	0.00387918	FALSE
AT4G23690	1813.28	-0.486532	0.116425	-4.17892	2.92901e-05	0.00387918	FALSE
AT4G15393	750.924	0.598656	0.143387	4.17511	2.97837e-05	0.00391566	FALSE
AT2G44180	628.225	0.464129	0.111323	4.16921	3.05659e-05	0.00399444	FALSE
AT4G21380	53.7312	0.755423	0.181404	4.16432	3.12286e-05	0.00405674	TRUE
AT5G57220	793.19	0.729693	0.17529	4.16279	3.14386e-05	0.00405986	TRUE
AT5G47980	481.858	-0.713543	0.171603	-4.1581	3.20911e-05	0.00411974	FALSE
AT1G77760	1140.07	0.741996	0.179349	4.13716	3.51626e-05	0.00448765	FALSE
AT3G20160	37.1067	-0.73418	0.178216	-4.11962	3.79503e-05	0.00481527	FALSE
AT4G04830	2723.34	-0.408679	0.0995274	-4.1062	4.02226e-05	0.00507409	FALSE
AT5G09600	108.999	-0.701793	0.171621	-4.08919	4.32883e-05	0.00542945	FALSE
AT5G23990	448.309	0.734849	0.179939	4.08389	4.42882e-05	0.00552311	FALSE
AT4G28410	329.052	-0.606573	0.148953	-4.07225	4.65603e-05	0.00577348	FALSE
AT4G34103	7.11056	-0.549755	0.135114	-4.06882	4.72515e-05	0.00582608	FALSE
AT1G01190	330.012	0.598644	0.147472	4.05938	4.92041e-05	0.00603276	FALSE
AT3G05950	50.5278	-0.709171	0.174819	-4.0566	4.97912e-05	0.00603731	FALSE
AT5G41280	8.58499	0.577461	0.142351	4.05659	4.97945e-05	0.00603731	TRUE
AT2G42160	310.431	0.539643	0.133102	4.05436	5.02726e-05	0.0060616	FALSE
AT1G69526	181.743	-0.641105	0.15897	-4.03288	5.50973e-05	0.00660683	FALSE
AT2G44070	7.14121	-0.540105	0.134143	-4.02633	5.66546e-05	0.00671972	FALSE
AT4G24340	331.755	-0.713635	0.177214	-4.02697	5.64994e-05	0.00671972	FALSE
AT4G29050	21.8779	0.71598	0.178842	4.00342	6.24328e-05	0.00736504	FALSE
AT1G13710	68.135	0.71467	0.179407	3.98351	6.79051e-05	0.00796753	FALSE
AT5G37950	6.82086	-0.543509	0.136714	-3.97553	7.02215e-05	0.00819526	FALSE
AT5G10970	139.484	0.633992	0.159646	3.97123	7.15018e-05	0.00830029	FALSE
AT2G44480	116.703	0.66249	0.16707	3.96533	7.3293e-05	0.00846321	FALSE
AT1G66800	472.446	-0.646948	0.163457	-3.95791	7.56088e-05	0.00868467	FALSE
AT5G26920	370.244	0.674218	0.17049	3.9546	7.66636e-05	0.00875972	TRUE
AT1G62310	179.14	0.571086	0.144594	3.94957	7.82921e-05	0.00885309	FALSE
AT4G23260	15.0318	0.635934	0.161009	3.94969	7.82529e-05	0.00885309	TRUE
AT5G38930	12.7555	-0.52545	0.133123	-3.94709	7.91066e-05	0.00889908	TRUE
AT5G39670	237.82	0.712948	0.180853	3.94214	8.0759e-05	0.00903839	FALSE
AT3G29120	23.1829	0.687801	0.174888	3.93282	8.39551e-05	0.00930069	FALSE
AT5G06900	135.79	0.572335	0.145519	3.93306	8.38729e-05	0.00930069	FALSE
AT4G25810	136.483	0.707915	0.18023	3.92785	8.5708e-05	0.00944693	FALSE
AT4G30910	556.126	-0.498665	0.127183	-3.92086	8.8233e-05	0.00967637	FALSE
AT1G06620	634.493	-0.483271	0.123703	-3.9067	9.35654e-05	0.0101653	FALSE
AT5G48000	2244.93	-0.623839	0.159691	-3.90655	9.36229e-05	0.0101653	FALSE
AT2G02300	23.8798	0.693959	0.177959	3.89954	9.6377e-05	0.0104125	FALSE
AT3G50480	38.6002	0.704913	0.181126	3.89184	9.94871e-05	0.0106956	FALSE
AT1G26390	997.974	0.669139	0.172	3.89034	0.000100103	0.010709	FALSE
AT5G53460	22157.3	0.530385	0.13642	3.88787	0.000101128	0.0107659	FALSE
AT3G61490	230.278	-0.53114	0.136758	-3.88379	0.000102841	0.0108952	FALSE
AT2G05440	28015.2	0.345359	0.0893329	3.86598	0.000110642	0.011665	FALSE
AT2G43000	153.969	0.699035	0.181101	3.85993	0.00011342	0.0118434	FALSE
AT5G58360	95.3987	0.648181	0.167913	3.86021	0.000113289	0.0118434	FALSE
AT3G46530	31.2245	0.69844	0.181404	3.85018	0.000118029	0.012266	FALSE
AT1G65481	60.8267	0.693994	0.180353	3.84798	0.000119097	0.0123184	FALSE
AT4G30120	193.149	-0.690492	0.180916	-3.81664	0.000135283	0.0139265	FALSE
AT4G11170	79.9763	0.689532	0.180926	3.81113	0.000138333	0.0141736	FALSE
AT4G18390	107.117	0.682643	0.179283	3.80764	0.000140302	0.0143082	FALSE
AT4G37220	20.6899	-0.609018	0.16015	-3.8028	0.000143069	0.0145225	FALSE
AT3G13760	273.46	0.579732	0.152595	3.79917	0.000145184	0.014669	FALSE
AT4G25240	472.168	0.446605	0.117629	3.79672	0.000146626	0.0147464	FALSE
AT2G02630	50.2664	0.685837	0.180949	3.79022	0.000150512	0.0150677	FALSE
AT3G16400	10312.1	-0.507475	0.134044	-3.78588	0.000153166	0.0152635	FALSE
AT5G40730	2568.36	-0.515292	0.136219	-3.78281	0.000155071	0.015383	FALSE
AT1G12110	3778.4	0.613547	0.162927	3.76578	0.000166031	0.0163957	FALSE
AT4G32220	7.56967	-0.517102	0.137676	-3.75592	0.000172706	0.0169781	FALSE
AT4G32210	128.539	0.595289	0.158891	3.74651	0.000179311	0.0175484	FALSE
AT4G31460	805.62	-0.401134	0.107511	-3.7311	0.000190647	0.0185745	FALSE
AT1G52800	119.117	0.663422	0.17793	3.72855	0.000192583	0.018597	FALSE
AT2G44620	1677.69	-0.395764	0.106115	-3.72959	0.000191792	0.018597	FALSE
AT1G05880	58.7122	0.671499	0.180369	3.72291	0.000196938	0.0189338	TRUE
AT2G27402	130.863	0.672647	0.180978	3.71674	0.000201809	0.0192467	FALSE
AT4G22010	1503.68	-0.508653	0.136861	-3.71656	0.000201956	0.0192467	FALSE
AT1G78000	3930.8	0.535678	0.144231	3.71403	0.000203983	0.0193325	FALSE
AT3G16450	11230.1	-0.502813	0.135411	-3.71323	0.000204628	0.0193325	FALSE
AT2G30750	2405.95	0.649636	0.175174	3.70853	0.000208467	0.0196102	FALSE
AT3G21550	154.511	-0.570823	0.154309	-3.69922	0.000216261	0.0202562	FALSE
AT1G52820	877.662	0.576207	0.156048	3.6925	0.000222062	0.0206835	FALSE
AT2G17060	102.282	0.660841	0.179005	3.69175	0.000222719	0.0206835	FALSE
AT4G31700	11312.2	-0.384857	0.104336	-3.68862	0.000225475	0.0208507	FALSE
AT1G22890	56.5792	0.630754	0.171202	3.68427	0.000229359	0.0210401	FALSE
AT4G34760	160.396	0.536733	0.145686	3.68417	0.000229451	0.0210401	FALSE
AT4G28790	44.3407	0.663661	0.180568	3.67541	0.000237472	0.0216845	FALSE
AT1G32100	563.7	-0.440536	0.119934	-3.67317	0.000239563	0.0217843	FALSE
AT2G44010	242.924	0.549583	0.150427	3.65349	0.000258695	0.0234264	FALSE
AT3G30260	18.0973	0.638886	0.175243	3.64571	0.000266654	0.0240293	FALSE
AT4G39770	431.852	0.526529	0.144459	3.64484	0.000267555	0.0240293	FALSE
AT1G29025	997.867	-0.505989	0.139525	-3.62651	0.000287275	0.0256946	FALSE
AT1G26240	135.224	0.656427	0.181402	3.61862	0.000296174	0.0260633	TRUE
AT2G37870	18.2957	-0.619918	0.171218	-3.62063	0.000293887	0.0260633	FALSE
AT3G14660	1557.95	0.452379	0.124955	3.62035	0.000294208	0.0260633	FALSE
AT4G31970	532.813	0.653844	0.180643	3.61953	0.000295135	0.0260633	TRUE
AT5G35935	206.776	-0.552317	0.152692	-3.61721	0.0002978	0.0261012	FALSE
AT1G26420	160.849	0.622547	0.172429	3.61045	0.000305666	0.0266835	TRUE
AT5G25250	242.956	0.609083	0.168807	3.60816	0.000308373	0.0268125	TRUE
AT2G43470	15.8544	0.570944	0.158908	3.59292	0.000326991	0.0281741	FALSE
AT4G25020	7.90098	0.485534	0.135164	3.59219	0.000327906	0.0281741	FALSE
AT5G40840	195.518	0.49968	0.13906	3.59326	0.000326569	0.0281741	FALSE
AT4G27350	298.824	-0.508463	0.141651	-3.58955	0.000331246	0.0283495	FALSE
AT3G17820	2624.86	-0.338916	0.0946847	-3.57942	0.000344364	0.029357	FALSE
AT1G19110	1080.98	0.422966	0.11831	3.57505	0.000350159	0.0297349	FALSE
AT5G39580	398.566	0.607902	0.1702	3.57169	0.000354689	0.0300028	TRUE
AT5G41080	3406.34	0.478123	0.134198	3.56281	0.000366903	0.0309161	FALSE
AT5G37790	681.88	0.400851	0.112936	3.54937	0.000386148	0.0324127	FALSE
AT1G15540	93.0224	0.459383	0.129805	3.53904	0.00040159	0.0334484	FALSE
AT1G17190	2496.46	-0.469454	0.132638	-3.53937	0.000401083	0.0334484	FALSE
AT4G23870	198.122	0.579479	0.163785	3.53806	0.000403085	0.0334484	FALSE
AT1G68238	170.443	0.575	0.162623	3.53578	0.000406573	0.0335987	FALSE
AT1G73120	784.969	-0.628979	0.177964	-3.5343	0.000408861	0.0335987	FALSE
AT4G29750	251.824	0.506583	0.14335	3.53387	0.000409515	0.0335987	FALSE
AT4G24275	188.42	-0.546036	0.155123	-3.52002	0.000431519	0.0352715	FALSE
AT2G02590	94.112	-0.601932	0.171776	-3.50416	0.000458051	0.0373004	FALSE
AT1G49160	384.87	0.45023	0.128705	3.49816	0.000468487	0.0380084	FALSE
AT5G40290	5.30774	-0.432177	0.123596	-3.4967	0.000471049	0.0380747	FALSE
AT3G51330	1487.24	0.367431	0.105195	3.49286	0.000477882	0.0384845	FALSE
AT5G66170	790.779	-0.546109	0.156471	-3.49017	0.000482709	0.0387303	FALSE
AT5G21280	132.64	-0.539521	0.15467	-3.48821	0.000486269	0.038873	FALSE
AT3G19680	297.817	-0.503514	0.144482	-3.48496	0.000492218	0.039205	FALSE
AT2G15220	957.665	0.528692	0.151778	3.48333	0.000495208	0.0392997	FALSE
AT4G09420	78.9064	0.582499	0.167543	3.47671	0.000507612	0.0401381	FALSE
AT3G18773	198.275	0.541933	0.156046	3.47291	0.000514857	0.040564	FALSE
AT3G62860	307.371	-0.518218	0.149281	-3.47142	0.000517707	0.0406419	FALSE
AT5G65980	58.3862	0.621696	0.179395	3.46552	0.00052921	0.041396	FALSE
AT1G21210	61.499	0.626916	0.181221	3.45941	0.000541362	0.0421953	TRUE
AT4G31000	220.095	0.570476	0.165248	3.45225	0.000555942	0.0431775	FALSE
AT4G28150	55.417	0.618355	0.17929	3.44891	0.000562853	0.0435592	FALSE
AT2G26980	1592.86	0.320625	0.0931477	3.44211	0.000577192	0.0445111	FALSE
AT4G32670	132.13	0.536587	0.155992	3.43985	0.000582047	0.0447274	FALSE
AT3G62020	150.75	-0.516234	0.150205	-3.43686	0.000588489	0.0449497	FALSE
AT5G41150	280.142	0.46112	0.134179	3.4366	0.000589059	0.0449497	FALSE
AT2G28960	761.391	0.487891	0.142446	3.42509	0.000614603	0.0467356	TRUE
AT3G54420	553.037	0.415815	0.121626	3.41879	0.000628997	0.047664	TRUE
AT5G38830	1016.77	0.32821	0.096128	3.41431	0.000639443	0.0482879	FALSE
AT5G10030	687.675	0.457445	0.134389	3.40389	0.000664329	0.0499942	FALSE
