# Supplementary material for: Complex-Type N-Glycans Influence the Root Hair Landscape of Arabidopsis Seedlings by Altering the Auxin Output
Source: Frontiers journal article supplement (doi:10.3389/fpls.2021.635714), 2021-02-18
Supplement: Data_Sheet_1.zip [file Data_Sheet_1.zip]

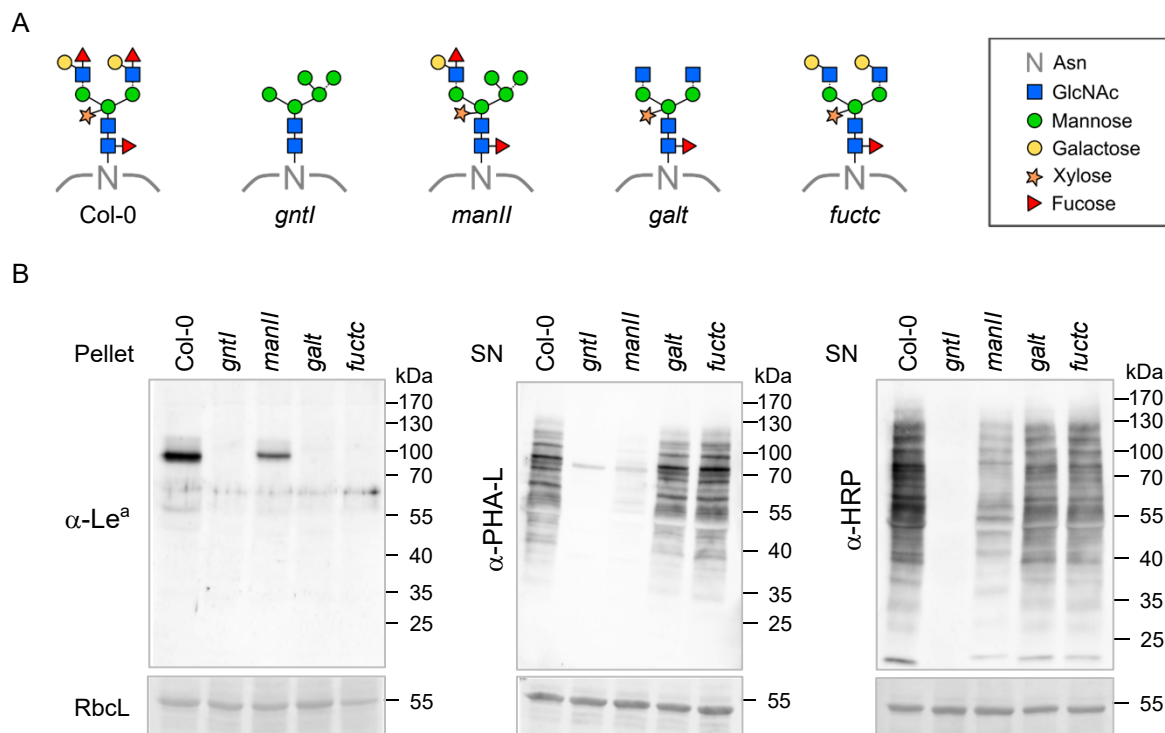

**Figure S1.** Immunoblot analyses of Arabidopsis seedlings (prior to transfer). A) Major N-glycans produced in the indicated genotypes. B) Arabidopsis seedlings (germinated for 3 d) were harvested (20 each) and frozen. Total soluble proteins were extracted without SDS (supernatant fractions, SN). Pellets (containing insoluble proteins) were then extracted in 3x lower buffer volume with 0.5% SDS. Lewis-a signals ( $\alpha$ -Le<sup>a</sup>, JIM84) were detected mainly in the pellet fractions, complex N-glycan signals were similarly abundant in both fractions (here, SN fractions). Note that  $\alpha$ -HRP recognizes both xylose and core fucose, whereas  $\alpha$ -PHA-L is largely xylose-specific. The prominent band of RubisCO large subunit (RbcL) of the Ponceau S-stained blots is shown as loading reference. Apparent molecular masses are indicated in kDa (PageRuler Prestained Protein Ladder, Fermentas). Asn, Asparagine; GlcNAc, N-acetylglucosamine.

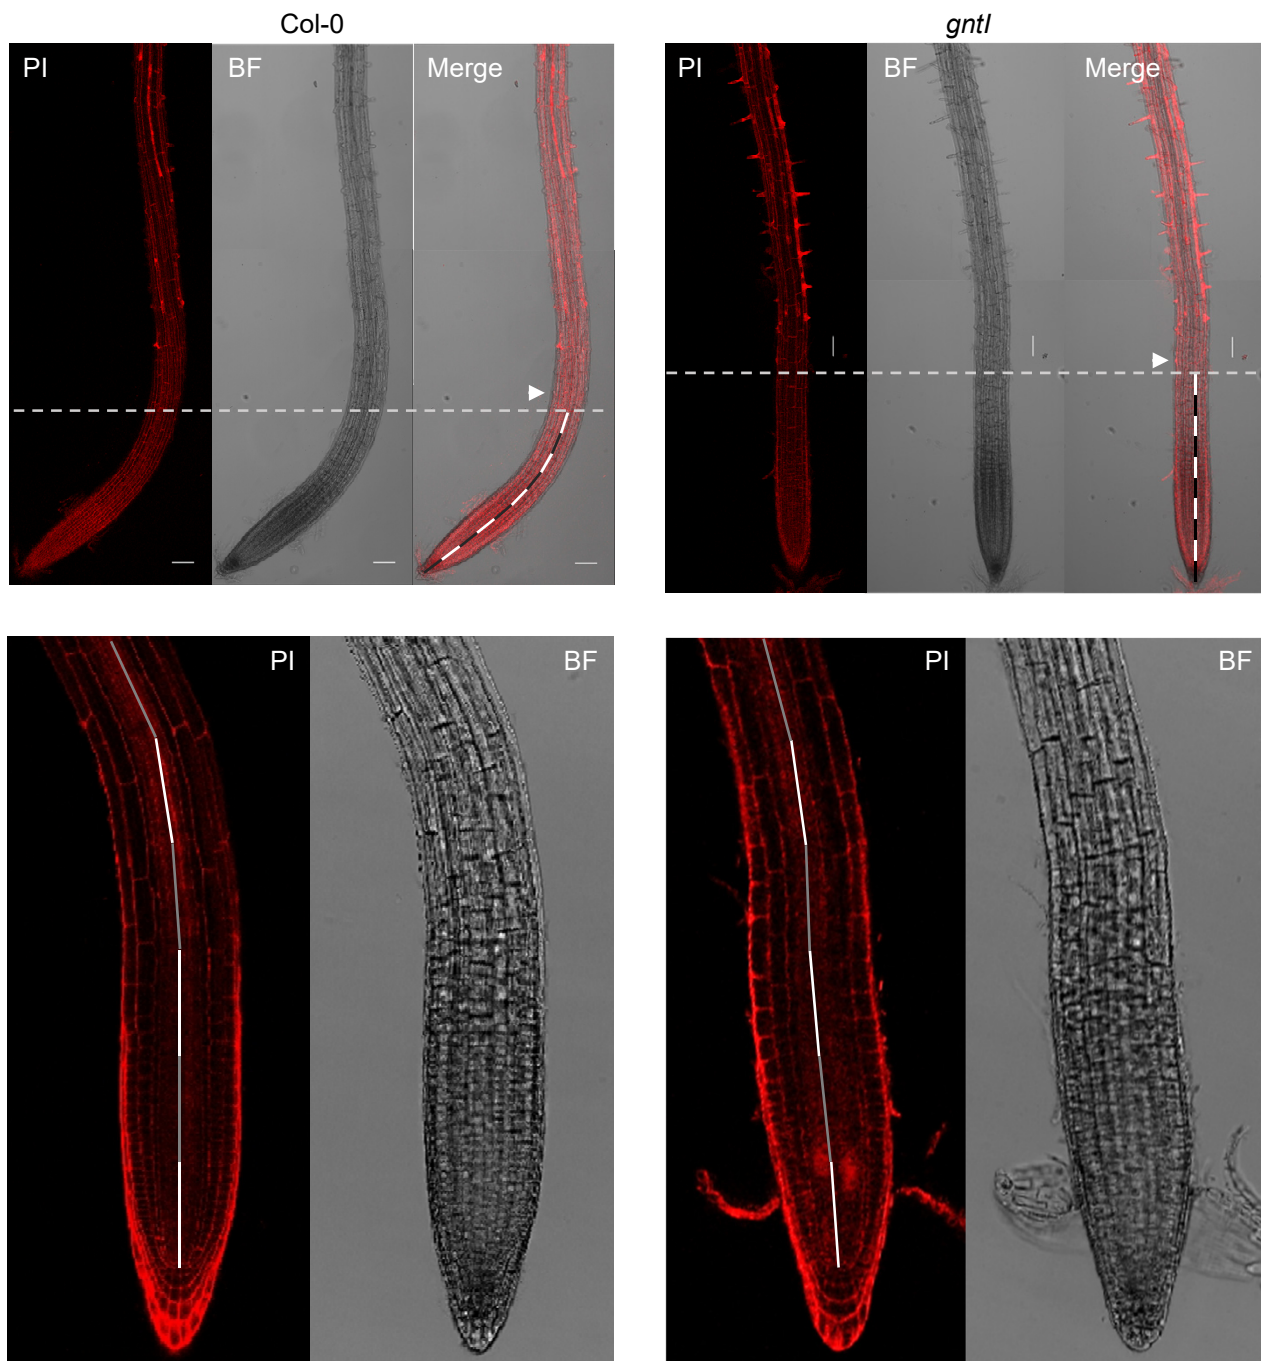

**Figure S2.** Picture of representative Col-0 and *gntl* roots stained with propidium iodide. Top, ten-day-old seedlings. White arrows mark the first visible root hair bulb. Dotted lines: first mm of the root tip. Bottom, meristematic zone of three-day-old seedlings. PI, propidium iodide; BF, bright field. Scale bars: 100  $\mu$ m.

A

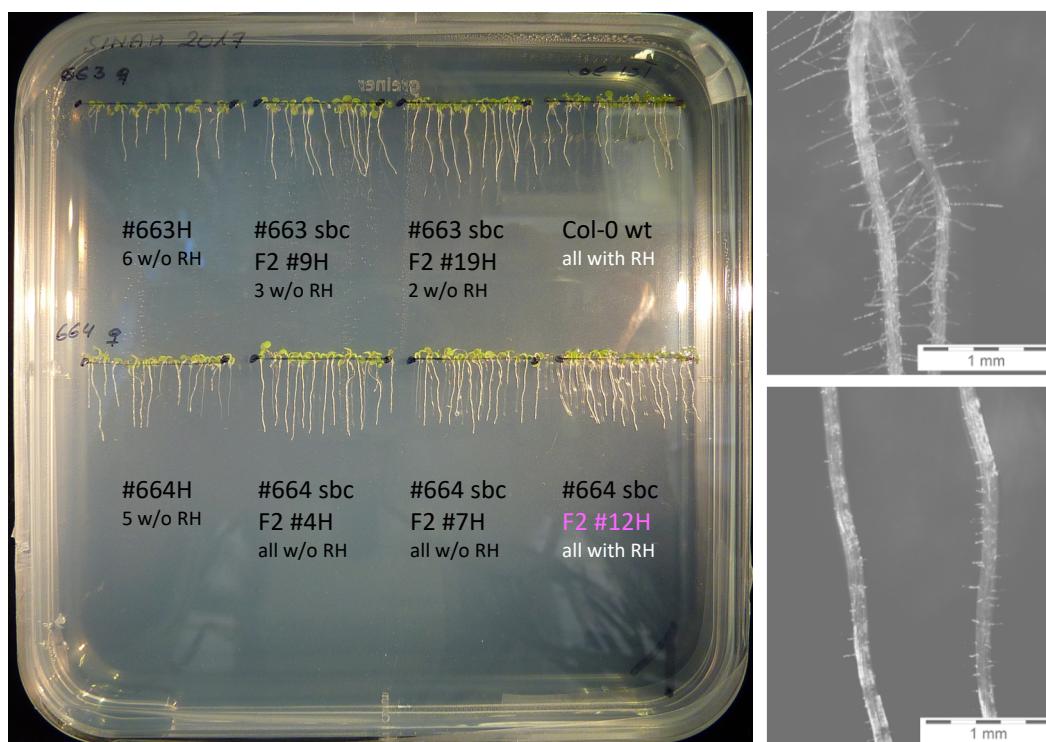

B

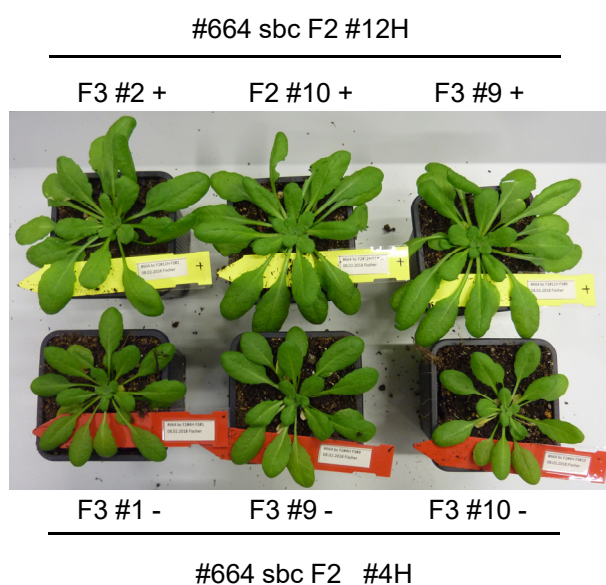

C

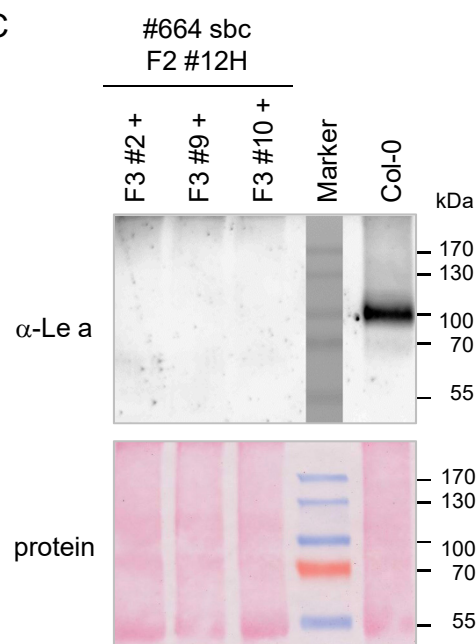

**Figure S3.** The *galt* line (SAIL\_170\_A08; Strasser et al. 2007) contained an unlinked RH mutation. A) Two homozygous *galt* plants (#663H and #664H) were backcrossed with wild type (Col-0 as pollen donor). F1 plants were checked by PCR for heterozygosity and allowed to self (sbc = selfed backcross). F2 plants were PCR tested for the *galt1-1* T-DNA insertion. Seeds of homozygous plants were surface sterilized, directly placed on square plates, sealed with Parafilm®, stratified, and grown vertically (left). Roots on plates were inspected for wild type-like RH (top right) or merely elongated RH (bottom right). B) F3 progeny of two F2 lines with (+) or without (-) RH. Note that the latter remain smaller upon growth in soil (bottom, red stickers). C) Immunoblot analysis of leaf extracts (pellet fractions). Using monoclonal rat antibodies (JIM84), lack of Lewis-a signals ( $\alpha$ -Le a) was confirmed in *galt1* F3 plants of F2 #12H with RH (+). The Ponceau S-stained blot below is shown as loading reference (protein). Molecular masses are indicated in kDa (Marker, PageRuler Prestained Protein Ladder (Fermentas)). Line F2 #12H was used for all further experiments.



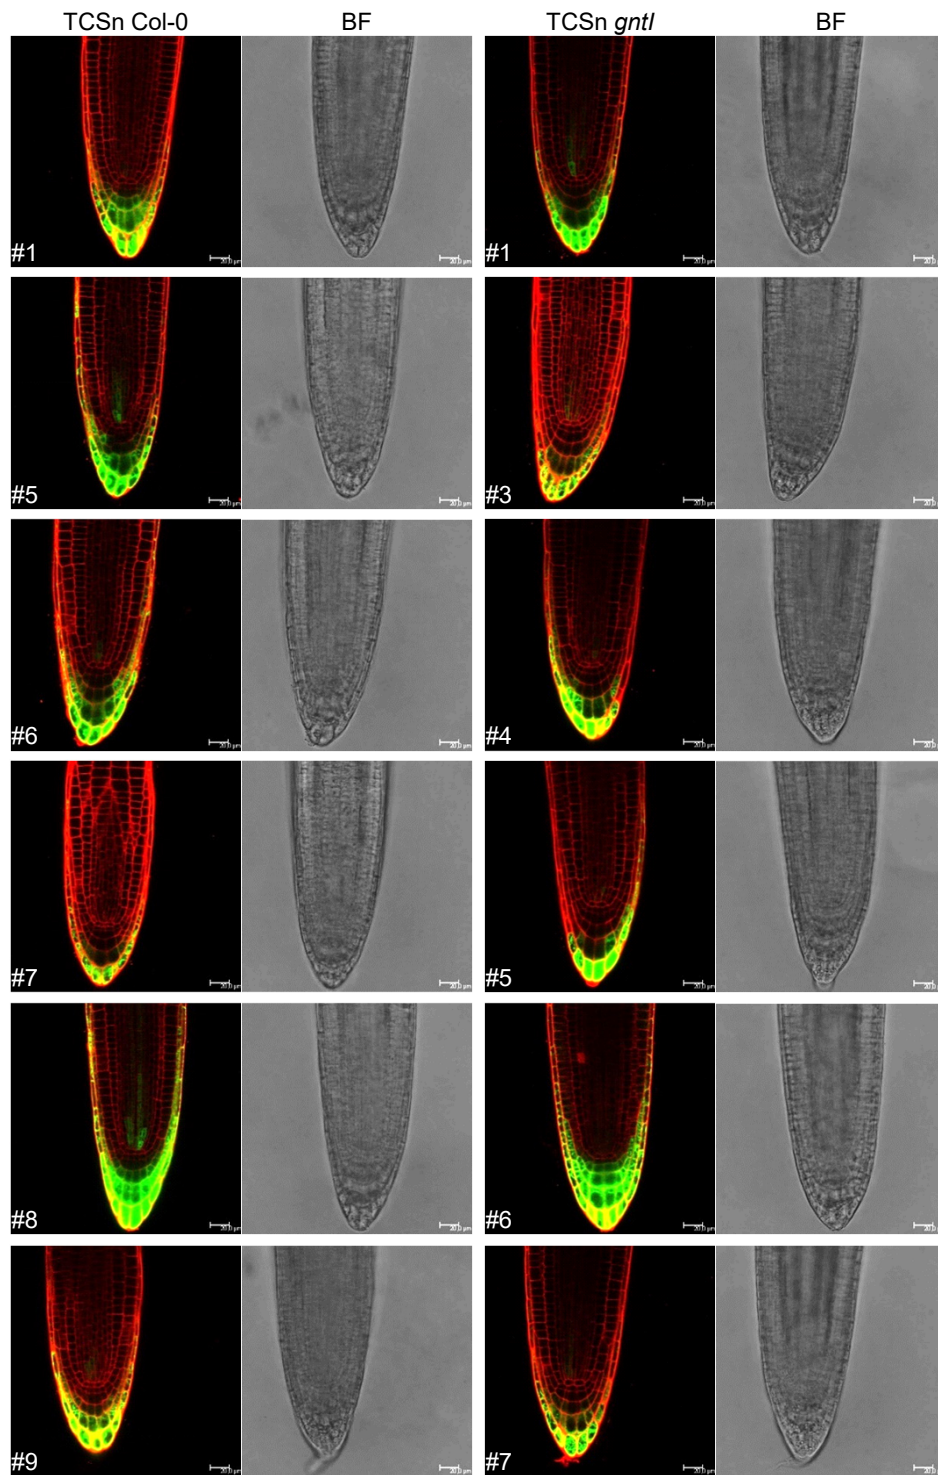

**Figure S4.** Root tip pictures of multiple independent *TCSn::GFP* (TCSn) lines (indicated by #) in Col-0 wild type and the *gntl* background taken in the same experimental setup shown in Figure 3. Scale bar: 20  $\mu$ m. BF, bright field.

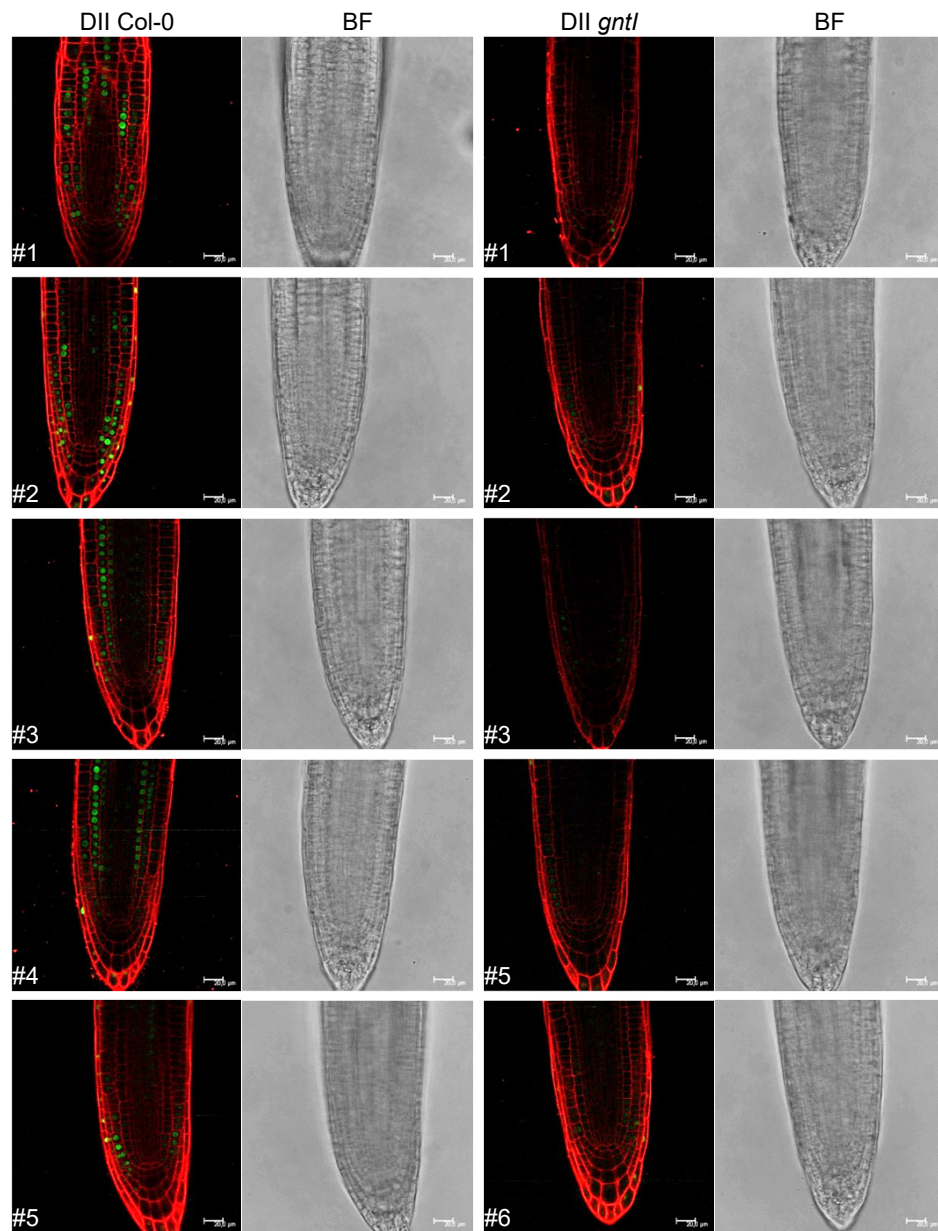

**Figure S5.** Root tip pictures of multiple independent *35S::DII-VENUS* (DII) lines (indicated by #) in Col-0 wild type and the *gnt1* background taken in the same experimental setup shown in Figure 3. Scale bar: 20  $\mu$ m. BF, bright field.

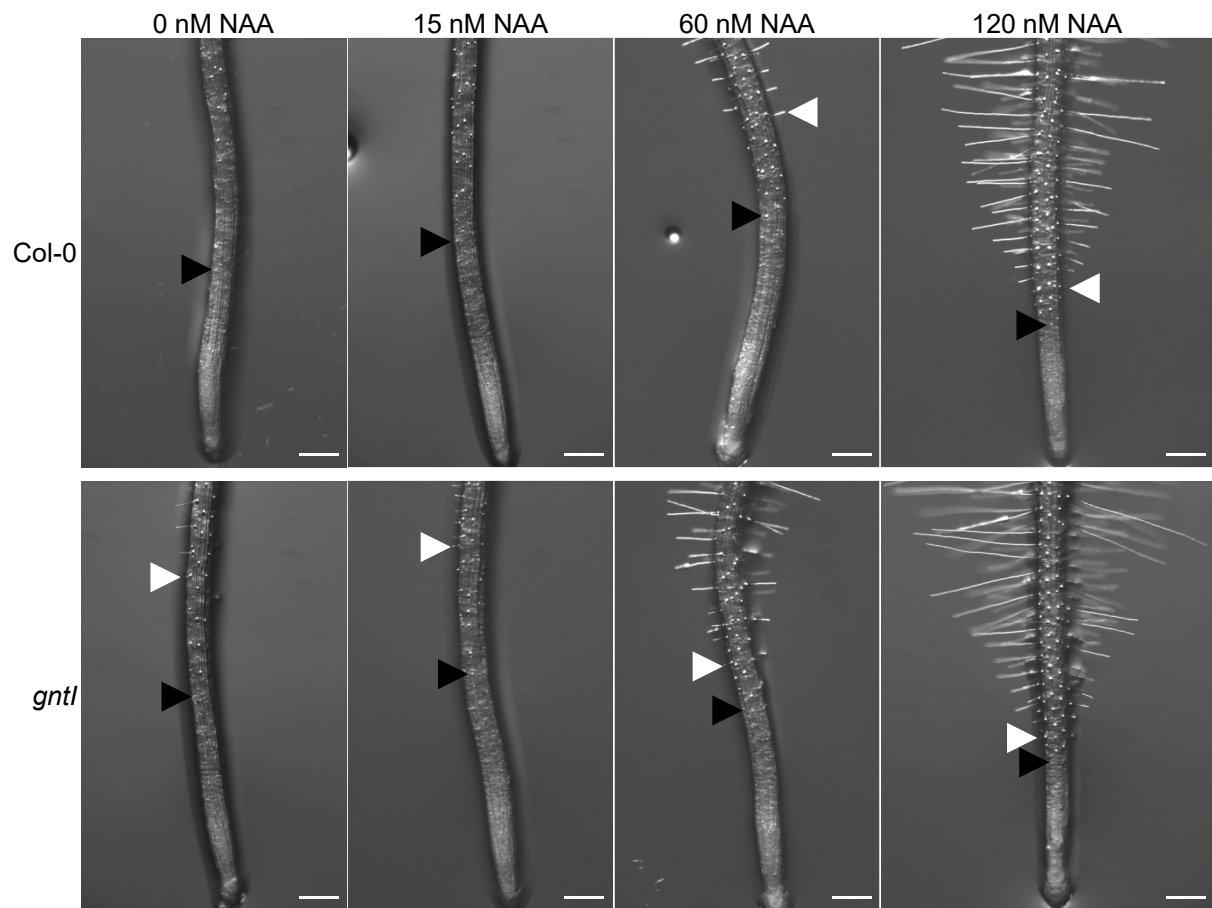

**Figure S6.** Pictures of representative *Col-0* and *gntl* root tips taken for measurements depicted in Figure 4. Black arrows indicate the first general root hair while white arrows point to the first partially elongated root hair. Scale bar: 250  $\mu$ m.

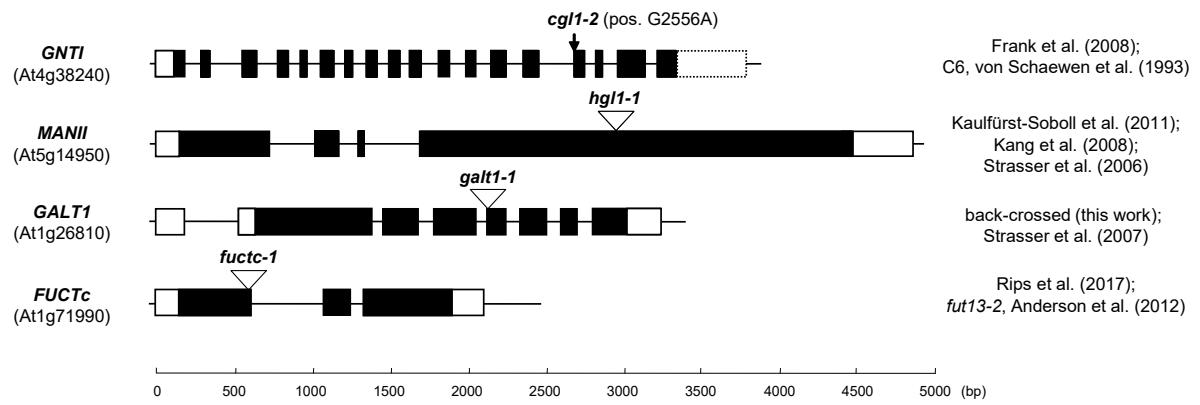

**Figure S7.** Schematic overview of mutant alleles used in this study. T-DNA insertions are indicated by a white triangle, while point mutations are displayed with a black arrow. Black boxes represent exon regions, black lines between exons display intron regions and white boxes 5' and 3' UTR, respectively.

**Table S1.** Genes found enriched in GO term 'cellular response to hypoxia' (GO:0071456) and sub GO terms.

| Gene ID   | Gene Name                                               | Log2-fold expression ( <i>gntI</i> vs. wild type) |
|-----------|---------------------------------------------------------|---------------------------------------------------|
| AT5G57220 | <i>P450 81F2, CYP81F2</i>                               | 0.7297                                            |
| AT1G26410 | <i>Berberine bridge enzyme-like 6, FOX4</i>             | 0.7952                                            |
| AT1G26380 | <i>Berberine bridge enzyme-like 3, FOX1</i>             | 0.8968                                            |
| AT1G14550 | <i>Peroxidase 5, PER5</i>                               | 0.7164                                            |
| AT5G26920 | <i>Calmodulin-binding protein 60 G, CBP60G</i>          | 0.6742                                            |
| AT2G23270 | <i>At2g23270</i>                                        | 0.8968                                            |
| AT5G13320 | <i>4-substituted benzoates-glutamate ligase, GH3.12</i> | 0.8279                                            |
| AT5G25250 | <i>Flotillin-like protein 1, FLOT1</i>                  | 0.6091                                            |
| AT1G05880 | <i>Probable E3 ubiquitin-protein ligase, ARI12</i>      | 0.6715                                            |
| AT4G31970 | <i>Xanthotoxin 5-hydroxylase, CYP82C2</i>               | 0.6538                                            |
| AT5G41080 | <i>Glycerophosphodiester phosphodiesterase, GDPD2</i>   | 0.4781                                            |
| AT1G19250 | <i>Probable flavin-containing monooxygenase 1, FMO1</i> | 0.7658                                            |
| AT4G34131 | <i>UDP-glycosyltransferase 73B3, UGT73B3</i>            | 0.6294                                            |
